# Supplementary material
Source: HighWire-hosted journal article supplement (https://jnm.snmjournals.org/highwire/filestream/95391/field_highwire_adjunct_files/0/205567_Supplemental_Data.pdf)
Supplement: 205567_Supplemental_Data.pdf [file 205567_Supplemental_Data.pdf]

**Supplemental Figure 1.** Effect of prevalence of non-surgical causes of painful TKA on 3-years cost-savings (X-axis) and QALYs gained (between square brackets) with bone SPECT/CT compared to CT and MARS-MRI.

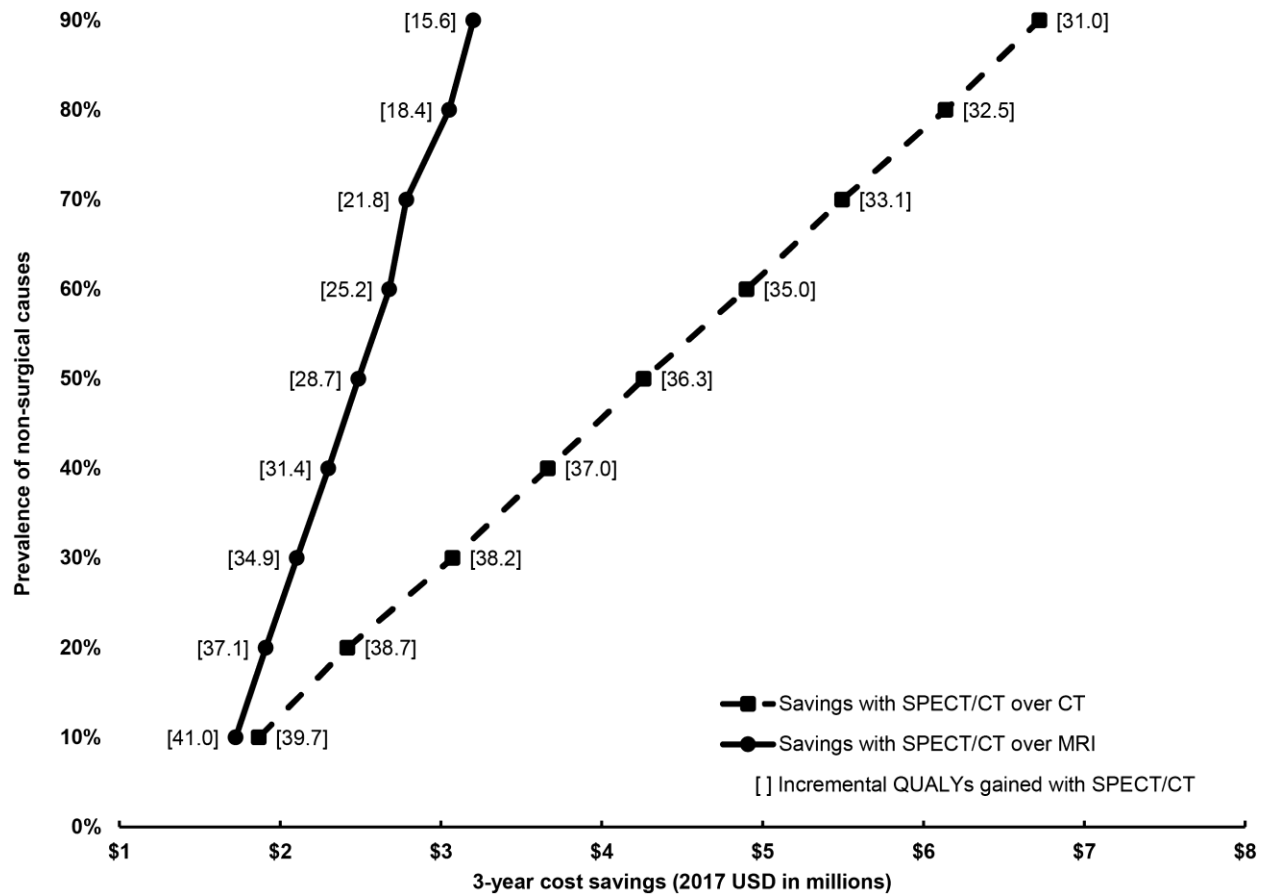

Abbreviations: CT: computed tomography; MARS-MRI: metal artifact reduction sequence magnetic resonance imaging; SPECT/CT: single-photon emission computed tomography with computed tomography; QALYs: quality adjusted life years
